# Supplementary material for: Identification and functional characterization of key biomarkers in diffuse large B-cell lymphoma: emphasis on STYX as a prognostic marker and therapeutic target
Source: Springer Nature journal article supplement (doi:10.1186/s41065-025-00411-w), 2025-03-24
Supplement: MOESM1 [file 41065_2025_411_MOESM1_ESM.pdf]

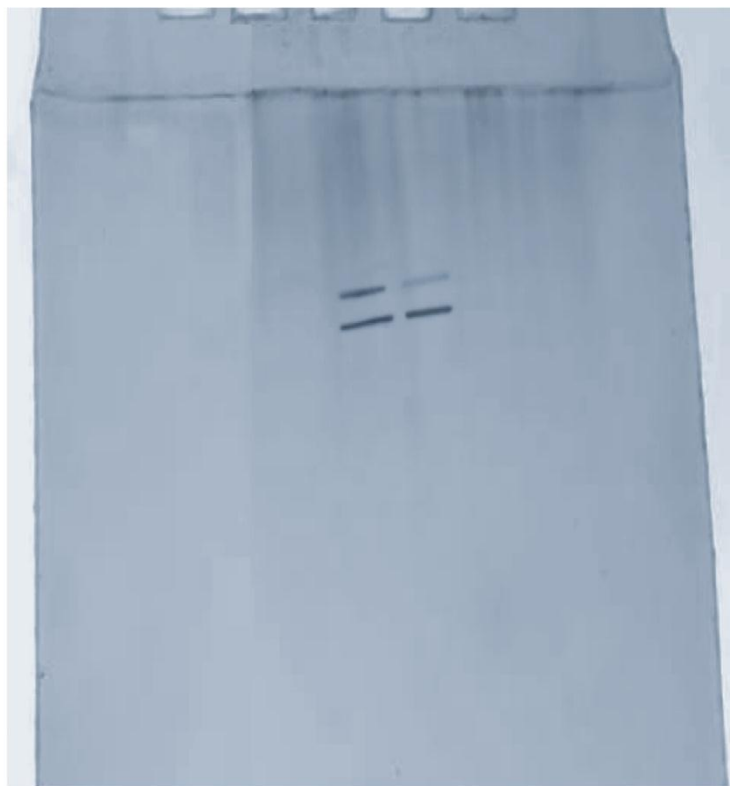

**Supplementary data Figure 1: Uncut Western blot bands of GAPDH and STYX in U2932 cells.**
